# Supplementary material for: SUPPORT‐AF: Piloting a Multi‐Faceted, Electronic Medical Record‐Based Intervention to Improve Prescription of Anticoagulation
Source: PubMed Central journal article supplement — J Am Heart Assoc. 2018 Sep 1;7(17):e009946. doi: 10.1161/JAHA.118.009946 (PMC6201433; doi:10.1161/jaha.118.009946), 2018-09-01
Supplement: JAH3-7-e009946-s001.pdf [file JAH3-7-e009946-s001.pdf]

# **SUPPLEMENTAL MATERIAL**

**Table S1. ICD-10 Diagnosis Codes for Atrial Fibrillation and CHA<sub>2</sub>DS<sub>2</sub>-VASc**

**Predictors.**

| <b>CHA<sub>2</sub>DS<sub>2</sub>-VASc Predictors</b> | <b>ICD-10 Code in Allscripts</b>              | <b>ICD-10 Code Name</b>                                                                                                                                         |
|------------------------------------------------------|-----------------------------------------------|-----------------------------------------------------------------------------------------------------------------------------------------------------------------|
| Atrial Fibrillation                                  | I48.0                                         | Paroxysmal atrial fibrillation                                                                                                                                  |
|                                                      | I48.1                                         | Persistent atrial fibrillation                                                                                                                                  |
|                                                      | I48.2                                         | Chronic atrial fibrillation                                                                                                                                     |
|                                                      | I48.91                                        | Unspecified atrial fibrillation                                                                                                                                 |
| Congestive Heart Failure                             | I50.1                                         | Left ventricular failure, unspecified                                                                                                                           |
|                                                      | I50.9                                         | Heart failure, unspecified                                                                                                                                      |
| Hypertension                                         | I10                                           | Essential (primary) hypertension                                                                                                                                |
|                                                      | I11.0                                         | Hypertensive Heart Disease With Heart Failure                                                                                                                   |
|                                                      | I11.9                                         | Hypertensive Heart Disease Without Heart Failure                                                                                                                |
|                                                      | I12.0                                         | Hypertensive Chronic Kidney Disease With Stage 5 Chronic Kidney Disease Or End Stage Renal Disease                                                              |
|                                                      | I12.9                                         | Hypertensive Chronic Kidney Disease With Stage 1 Through Stage 4 Chronic Kidney Disease, Or Unspecified Chronic Kidney Disease                                  |
|                                                      | I13.0                                         | Hypertensive Heart And Chronic Kidney Disease With Heart Failure And Stage 1 Through Stage 4 Chronic Kidney Disease, Or Unspecified Chronic Kidney Disease      |
|                                                      | I13.10                                        | Hypertensive Heart And Chronic Kidney Disease Without Heart Failure, With Stage 1 Through Stage 4 Chronic Kidney Disease, Or Unspecified Chronic Kidney Disease |
|                                                      | I13.11                                        | Hypertensive Heart And Chronic Kidney Disease Without Heart Failure, With Stage 5 Chronic Kidney Disease, Or End Stage Renal Disease                            |
|                                                      | I13.2                                         | Hypertensive Heart And Chronic Kidney Disease With Heart Failure And With Stage 5 Chronic Kidney Disease, Or End Stage Renal Disease                            |
|                                                      | I15.0                                         | Renovascular Hypertension                                                                                                                                       |
|                                                      | I15.1                                         | Hypertension Secondary To Other Renal Disorders                                                                                                                 |
| I15.2                                                | Hypertension Secondary To Endocrine Disorders |                                                                                                                                                                 |
| I15.8                                                | Other Secondary Hypertension                  |                                                                                                                                                                 |
| I15.9                                                | Secondary Hypertension, Unspecified           |                                                                                                                                                                 |
| Diabetes                                             | E10.10                                        | Type 1 Diabetes Mellitus With Ketoacidosis Without Coma                                                                                                         |

|          |                                                                                    |
|----------|------------------------------------------------------------------------------------|
| E10.11   | Type 1 Diabetes Mellitus With Ketoacidosis With Coma                               |
| E10.21   | Type 1 Diabetes Mellitus With Diabetic Nephropathy                                 |
| E10.22   | Type 1 Diabetes Mellitus With Diabetic Chronic Kidney Disease                      |
| E10.29   | Type 1 Diabetes Mellitus With Other Diabetic Kidney Complication                   |
| E10.31x  | Type 1 Diabetes Mellitus With Unspecified Diabetic Retinopathy                     |
| E10.32x  | Type 1 Diabetes Mellitus With Mild Nonproliferative Diabetic Retinopathy           |
| E10.33x  | Type 1 Diabetes Mellitus With Moderate Nonproliferative Diabetic Retinopathy       |
| E10.34x  | Type 1 Diabetes Mellitus With Severe Nonproliferative Diabetic Retinopathy         |
| E10.35x  | Type 1 Diabetes Mellitus With Proliferative Diabetic Retinopathy                   |
| E10.36   | Type 1 Diabetes Mellitus With Diabetic Cataract                                    |
| E10.37Xx | Type 1 Diabetes Mellitus With Diabetic Macular Edema, Resolved Following Treatment |
| E10.39   | Type 1 Diabetes Mellitus With Other Diabetic Ophthalmic Complication               |
| E10.40   | Type 1 Diabetes Mellitus With Diabetic Neuropathy, Unspecified                     |
| E10.41   | Type 1 Diabetes Mellitus With Diabetic Mononeuropathy                              |
| E10.42   | Type 1 Diabetes Mellitus With Diabetic Polyneuropathy                              |
| E10.43   | Type 1 Diabetes Mellitus With Diabetic Autonomic (Poly)Neuropathy                  |
| E10.44   | Type 1 Diabetes Mellitus With Diabetic Amyotrophy                                  |
| E10.49   | Type 1 Diabetes Mellitus With Other Diabetic Neurological Complication             |
| E10.51   | Type 1 Diabetes Mellitus With Diabetic Peripheral Angiopathy Without Gangrene      |
| E10.52   | Type 1 Diabetes Mellitus With Diabetic Peripheral Angiopathy With Gangrene         |
| E10.59   | Type 1 Diabetes Mellitus With Other Circulatory Complications                      |
| E10.610  | Type 1 Diabetes Mellitus With Diabetic Neuropathic Arthropathy                     |
| E10.618  | Type 1 Diabetes Mellitus With Other Diabetic Arthropathy                           |
| E10.620  | Type 1 Diabetes Mellitus With Diabetic Dermatitis                                  |
| E10.621  | Type 1 Diabetes Mellitus With Foot Ulcer                                           |
| E10.622  | Type 1 Diabetes Mellitus With Other Skin Ulcer                                     |
| E10.628  | Type 1 Diabetes Mellitus With Other Skin Complications                             |

|          |                                                                                                          |
|----------|----------------------------------------------------------------------------------------------------------|
| E10.630  | Type 1 Diabetes Mellitus With Periodontal Disease                                                        |
| E10.638  | Type 1 Diabetes Mellitus With Other Oral Complications                                                   |
| E10.641  | Type 1 Diabetes Mellitus With Hypoglycemia With Coma                                                     |
| E10.649  | Type 1 Diabetes Mellitus With Hypoglycemia Without Coma                                                  |
| E10.65   | Type 1 Diabetes Mellitus With Hyperglycemia                                                              |
| E10.69   | Type 1 Diabetes Mellitus With Other Specified Complication                                               |
| E10.8    | Type 1 Diabetes Mellitus With Unspecified Complications                                                  |
| E10.9    | Type 1 Diabetes Mellitus Without Complications                                                           |
| E11.00   | Type 2 Diabetes Mellitus With Hyperosmolarity Without Nonketotic Hyperglycemic-Hyperosmolar Coma (Nkhhc) |
| E11.01   | Type 2 Diabetes Mellitus With Hyperosmolarity With Coma                                                  |
| E11.21   | Type 2 Diabetes Mellitus With Diabetic Nephropathy                                                       |
| E11.22   | Type 2 Diabetes Mellitus With Diabetic Chronic Kidney Disease                                            |
| E11.29   | Type 2 Diabetes Mellitus With Other Diabetic Kidney Complication                                         |
| E11.31x  | Type 2 Diabetes Mellitus With Unspecified Diabetic Retinopathy                                           |
| E11.32x  | Type 2 Diabetes Mellitus With Mild Nonproliferative Diabetic Retinopathy                                 |
| E11.33x  | Type 2 Diabetes Mellitus With Moderate Nonproliferative Diabetic Retinopathy                             |
| E11.34x  | Type 2 Diabetes Mellitus With Severe Nonproliferative Diabetic Retinopathy                               |
| E11.35x  | Type 2 Diabetes Mellitus With Proliferative Diabetic Retinopathy                                         |
| E11.36   | Type 2 Diabetes Mellitus With Diabetic Cataract                                                          |
| E11.37Xx | Type 2 Diabetes Mellitus With Diabetic Macular Edema, Resolved Following Treatment                       |
| E11.39   | Type 2 Diabetes Mellitus With Other Diabetic Ophthalmic Complication                                     |
| E11.40   | Type 2 Diabetes Mellitus With Diabetic Neuropathy, Unspecified                                           |
| E11.41   | Type 2 Diabetes Mellitus With Diabetic Mononeuropathy                                                    |
| E11.42   | Type 2 Diabetes Mellitus With Diabetic Polyneuropathy                                                    |
| E11.43   | Type 2 Diabetes Mellitus With Diabetic Autonomic (Poly)Neuropathy                                        |
| E11.44   | Type 2 Diabetes Mellitus With Diabetic Amyotrophy                                                        |
| E11.49   | Type 2 Diabetes Mellitus With Other Diabetic                                                             |

|                                |                    |                                                                               |
|--------------------------------|--------------------|-------------------------------------------------------------------------------|
|                                |                    | Neurological Complication                                                     |
|                                | E11.51             | Type 2 Diabetes Mellitus With Diabetic Peripheral Angiopathy Without Gangrene |
|                                | E11.52             | Type 2 Diabetes Mellitus With Diabetic Peripheral Angiopathy With Gangrene    |
|                                | E11.59             | Type 2 Diabetes Mellitus With Other Circulatory Complications                 |
|                                | E11.610            | Type 2 Diabetes Mellitus With Diabetic Neuropathic Arthropathy                |
|                                | E11.618            | Type 2 Diabetes Mellitus With Other Diabetic Arthropathy                      |
|                                | E11.620            | Type 2 Diabetes Mellitus With Diabetic Dermatitis                             |
|                                | E11.621            | Type 2 Diabetes Mellitus With Foot Ulcer                                      |
|                                | E11.622            | Type 2 Diabetes Mellitus With Other Skin Ulcer                                |
|                                | E11.628            | Type 2 Diabetes Mellitus With Other Skin Complications                        |
|                                | E11.630            | Type 2 Diabetes Mellitus With Periodontal Disease                             |
|                                | E11.638            | Type 2 Diabetes Mellitus With Other Oral Complications                        |
|                                | E11.641            | Type 2 Diabetes Mellitus With Hypoglycemia With Coma                          |
|                                | E11.649            | Type 2 Diabetes Mellitus With Hypoglycemia Without Coma                       |
|                                | E11.65             | Type 2 Diabetes Mellitus With Hyperglycemia                                   |
|                                | E11.69             | Type 2 Diabetes Mellitus With Other Specified Complication                    |
|                                | E11.8              | Type 2 Diabetes Mellitus With Unspecified Complications                       |
|                                | E11.9              | Type 2 Diabetes Mellitus Without Complications                                |
|                                | E13.x              | Other Specified Diabetes Mellitus                                             |
| Stroke/TIA/<br>Thromboembolism | G45.9              | Transient cerebral ischemic attack, unspecified.                              |
|                                | I63.0x, I63.3x     | Cerebral Infarction Due To Thrombosis                                         |
|                                | I63.1x, I63.4x     | Cerebral Infarction Due To Embolism                                           |
|                                | I63.2x, I63.5x     | Cerebral Infarction Due To Unspecified Occlusion Or Stenosis                  |
|                                | I63.6              | Cerebral Infarction Due To Cerebral Venous Thrombosis, Nonpyogenic            |
|                                | I63.8              | Other Cerebral Infarction                                                     |
|                                | I63.9              | Cerebral Infarction, Unspecified                                              |
|                                | I74.01             | Saddle Embolus Of Abdominal Aorta                                             |
|                                | I74.09             | Other Arterial Embolism And Thrombosis Of Abdominal Aorta                     |
|                                | I74.x (x = 1 to 9) | Embolism And Thrombosis                                                       |
| Vascular Disease               | I21.x (x = 0 to 3) | St Elevation (STEMI) Myocardial Infarction                                    |

|                               |                                                                                     |
|-------------------------------|-------------------------------------------------------------------------------------|
| I21.4                         | Non-St Elevation (NSTEMI) Myocardial Infarction                                     |
| I22.0, I22.1,<br>I22.8, I22.9 | Subsequent St Elevation (STEMI) Myocardial<br>Infarction                            |
| I22.2                         | Subsequent Non-St Elevation (NSTEMI) Myocardial<br>Infarction                       |
| I25.2                         | Old Myocardial Infarction                                                           |
| I25.10, I25.11x               | Atherosclerotic Heart Disease Of Native Coronary<br>Artery                          |
| I70.20x                       | Unspecified Atherosclerosis Of Native Arteries Of<br>Extremities                    |
| I70.21x                       | Atherosclerosis Of Native Arteries Of Extremities With<br>Intermittent Claudication |
| I70.22x                       | Atherosclerosis Of Native Arteries Of Extremities With<br>Rest Pain                 |
| I70.23x                       | Atherosclerosis Of Native Arteries Of Right Leg With<br>Ulceration                  |
| I70.24x                       | Atherosclerosis Of Native Arteries Of Left Leg With<br>Ulceration                   |
| I70.25                        | Atherosclerosis Of Native Arteries Of Other<br>Extremities With Ulceration          |
| I70.0                         | Atherosclerosis Of Aorta                                                            |
